# Supplementary material
Source: publisher figshare collection journal article supplement (https://frontiersin.figshare.com/ndownloader/files/22087176)
Supplement: Supplementary file [file 22087176]

### Figure S1: Gating strategy for urinary cells

Exemplary mass cytometric data analysis of urinary (A) and peripheral blood cells (B) (patient 04) by manual gating. Plots 1-3 were successively applied to discriminate single, live cells from cell debris, cell aggregates and dead cells according to Tanner et al., 2013 and Baumgart et al., 2017. Four-element beads added as internal standard to samples prior to data acquisition for later normalization (Finck et al., 2013) were excluded according to their unique  $^{140}\text{Ce}$  signal (plot 4). In plot 5 we have gated on all nucleated cells including CD45-positive and negative cells since a clear separation of positive and negative cell subsets was not possible. This is caused by granulocytes, which show a weaker expression of CD45 than other leukocyte subsets and especially in urine samples by other non-leukocytic cells, which do not express CD45, such as epithelial cells.

As next  $\text{CD3}^+\text{CD16}^-$  T cells (T) were gated in plot 6. They were further divided into  $\text{CD4}^+$ ,  $\text{CD8}^+$  and  $\text{CD4}^-\text{CD8}^-$  double-negative (DN) T cells (plot 11).  $\text{CD4}^+\text{CD25}^+\text{CD127}^{\text{low}}$  regulatory T cells (Treg's) were gated proceeding from  $\text{CD4}^+$  T cells (plot 12). For both  $\text{CD4}^+$  and  $\text{CD8}^+$  cells, frequencies of HLA-DR expressing cells (plots 13 and 14, respectively) and frequencies of CD45RA/CD45RO expressing cells were extracted (plots 15 and 16). Furthermore, CD45RA was plotted against CD197 to allow discrimination of  $\text{CD45RA}^+\text{CD197}^+$  naive,  $\text{CD45RA}^-\text{CD197}^+$  central memory (CM),  $\text{CD45RA}^-\text{CD197}^-$  effector memory (EM) and  $\text{CD45RA}^+\text{CD197}^-$  terminal differentiated effector T cells (TEMRA) (plots 17 and 18, respectively). Activated EM cell subsets were identified by the co-expression of  $\text{CD38}^+\text{CD69}^+$  (plots 19 and 20, respectively).  $\text{CD19}^+$  and/or  $\text{CD20}^+$  cells were identified as B cells (plot 7).  $\text{CD3}^-/\text{CD19}^-/\text{CD20}^-$  -negative cells were used from plot 7 to gate on  $\text{CD56}^+/\text{CD16}^+$  classical NK cells, which are negative for HLA-DR and CD14 (plot 9).

As next myeloid cells were identified using  $\text{CD3}^-/\text{CD19}^-/\text{CD20}^-/\text{CD56}^-$  cells (plot 8), which were gated for CD15 and CD36 (plot 21). Eosinophilic granulocytes were identified as  $\text{CD19}^-/\text{CD20}^-/\text{CD36}^-/\text{CD16}^-/\text{CD15}^+/\text{Siglec8}^+$  cells after excluding neutrophilic granulocytes (plot 22).

Neutrophilic granulocytes were then depleted by contaminations with HLA-DR-positive cells and were finally read out in plot 24.

Monocytes and dendritic cells were identified according to  $CD3^-CD19^-CD20^-CD15^{+/-}CD36^+HLA-DR^{+/-}$  cells (plot 26), which were finally gated for  $CD14^{++}CD16^-$  classical and  $CD14^{dim}CD16^+$  non-classical monocytes (plot 27). Dendritic cell subsets were pre-gated on  $CD14^-CD16^-$  double-negative cells of plot 27. pDCs were finally identified by their expression of  $CD123^+CD303^+$  (plot 29) and mDCs as being  $CD123^-CD303^-$  (plot 29), which were then gated for CD1c and CD11c (plot 30). In the plots 10, 25 and 28 the expression of CD45 is shown for T cells, neutrophils and classical monocytes.

**Figure S1A**

Manual gating scheme of blood cells (patient 04).

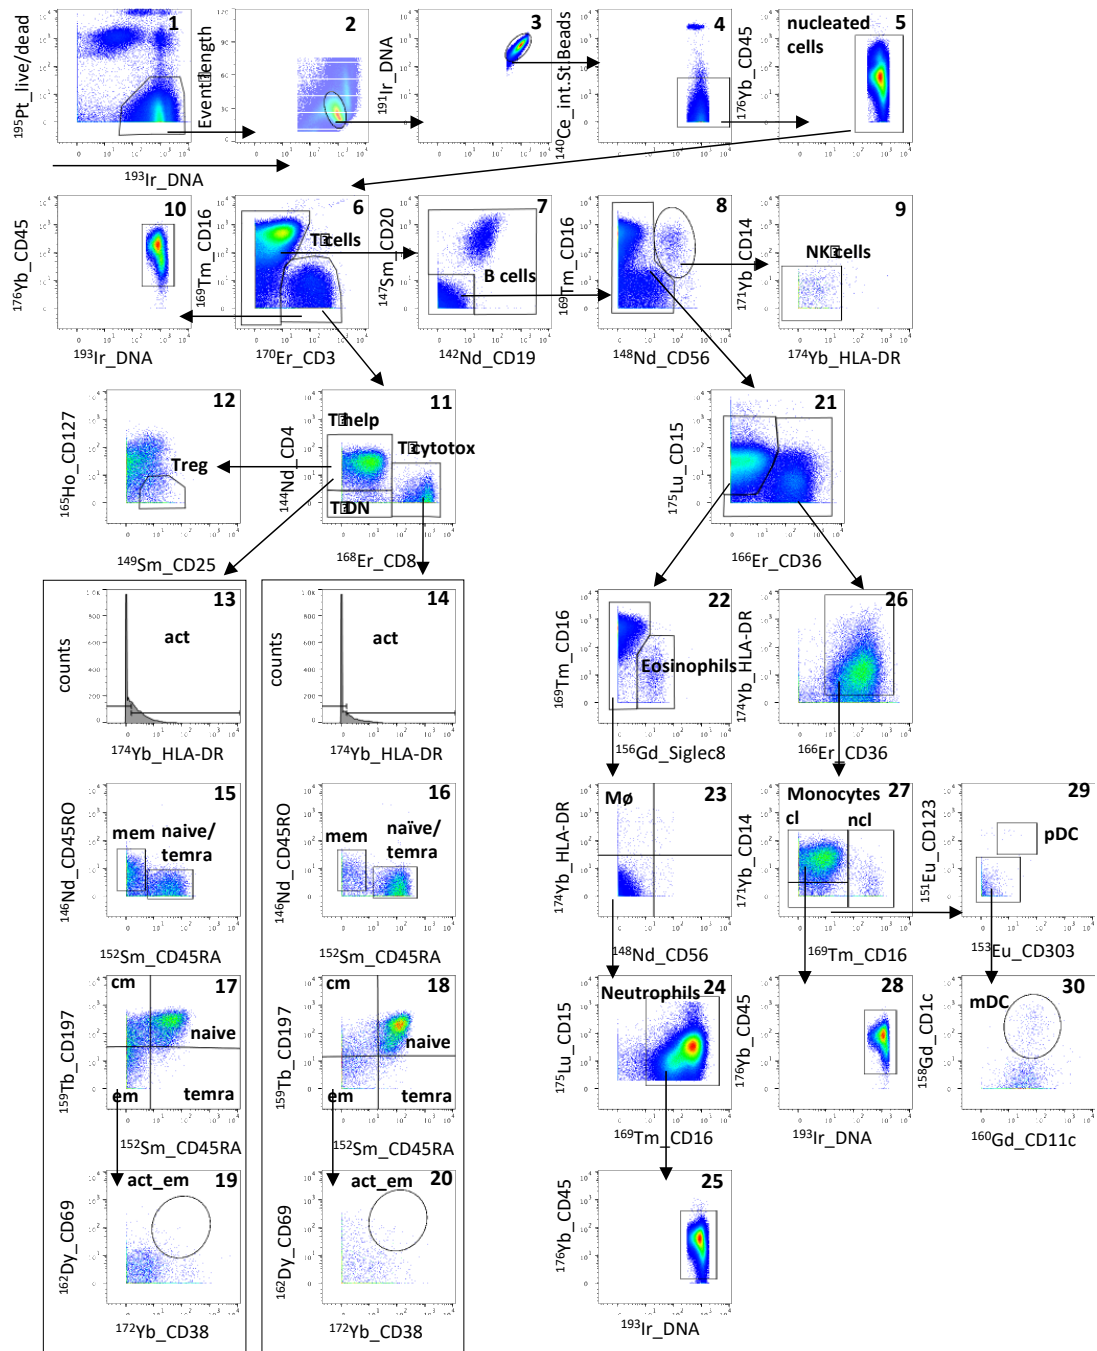

**Figure S1B**

Manual gating scheme of urine cells (patient 04).

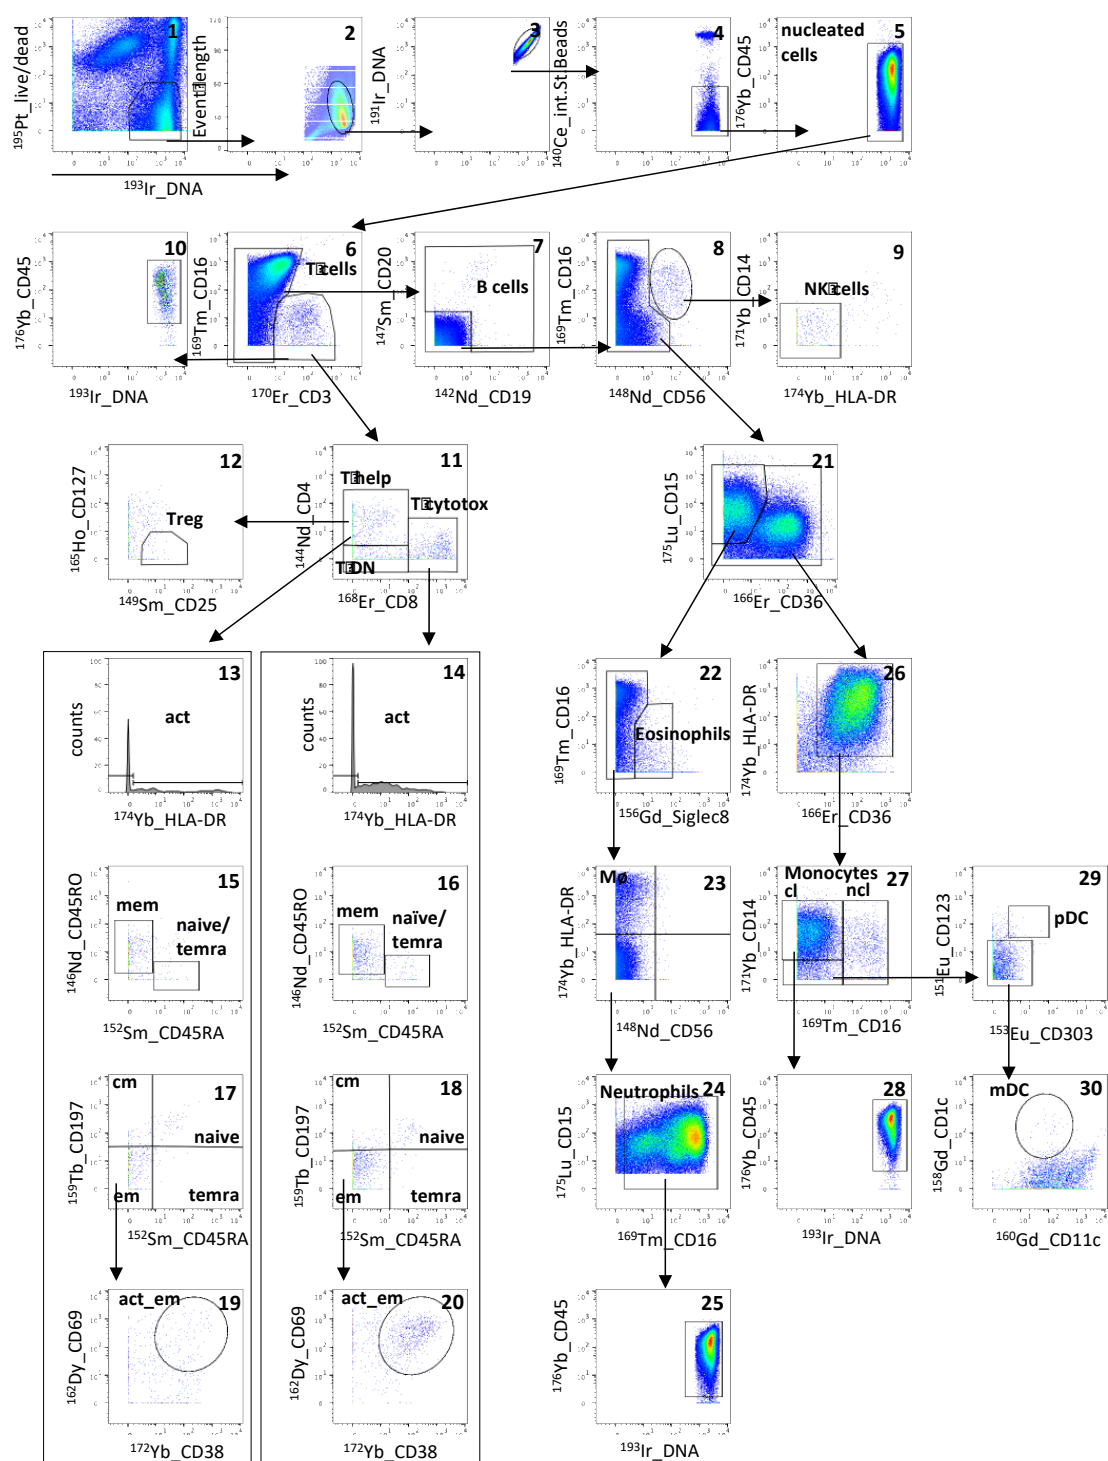

**Figure S2: Absolute numbers of live nucleated urine cell counts acquired by mass cytometry**

Number of viable urinary cells acquired by mass cytometry according to plot 5 (Figure S1B).

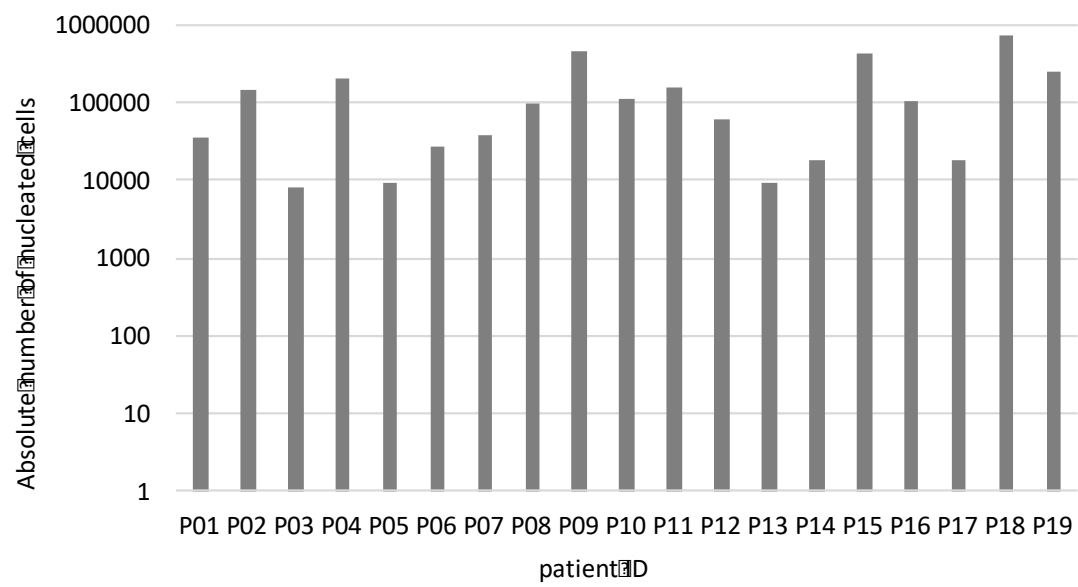

### Figure S3: Phenotypic characterization of blood and urinary monocytes/macrophages

Exemplary phenotypic characterization of the Monocyte/Macrophage clusters of blood and urine identified by t-SNE analysis from Figure 3 (P04) for the expression of HLA-DR, CD11c, CD36, CD14 and CD38.

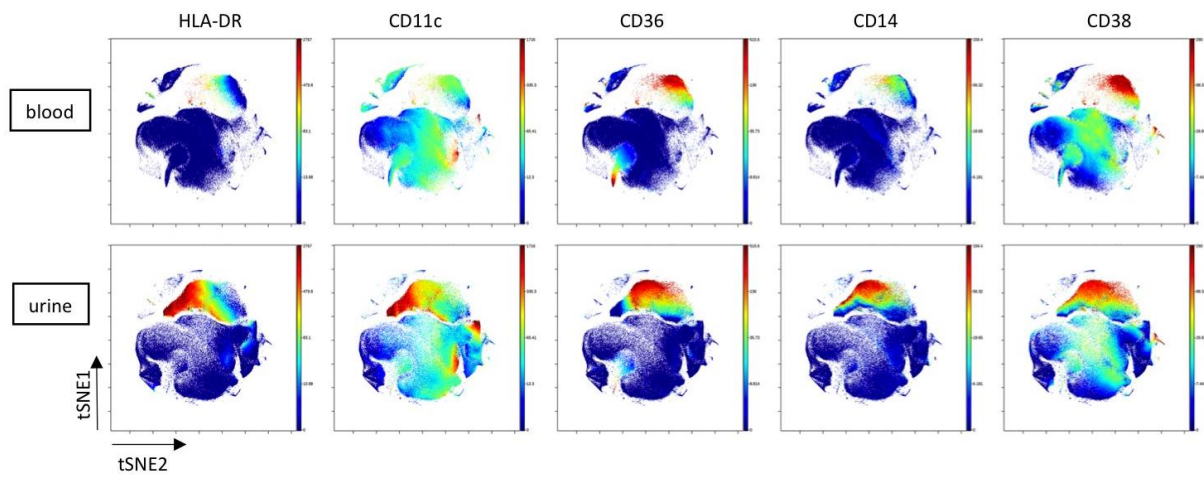

### Figure S4: Correlation analysis of T helper cells with proteinuria

A Pearson correlation analysis was performed based on CD4 T cell frequencies and the clinical parameter proteinuria.

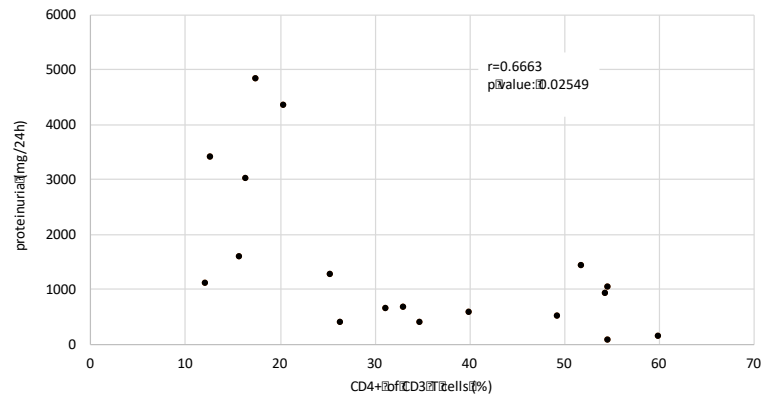

### Figure S5: Detection of urinary M2-like macrophages

In two out of six samples (P02 and P04) M2-like macrophages co-expressing CD163<sup>+/+</sup> and CD206<sup>+</sup> were detected. The expression of CD163 was significantly decreased in urinary cells if compared to blood monocytes, which did not express CD206.

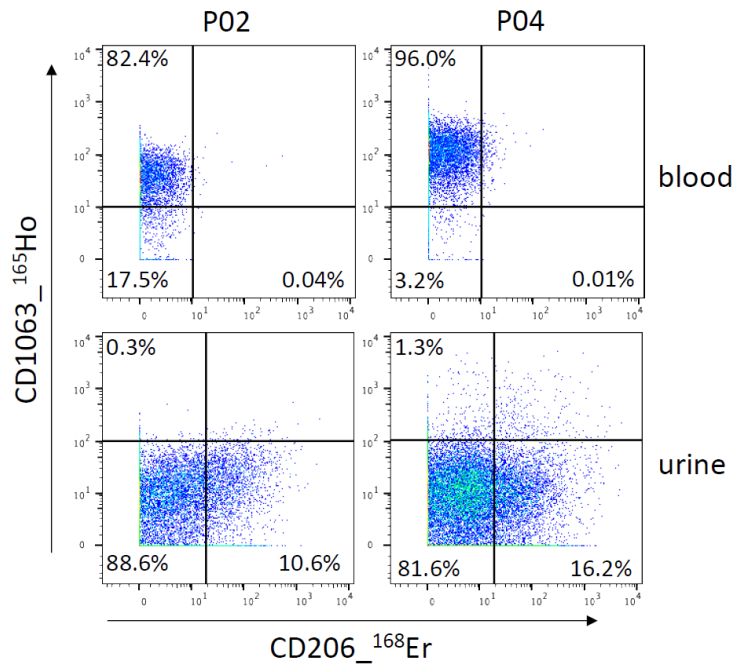

**Table S1: List of antibody conjugates and staining reagents used in this study**

All pre-conjugated antibodies and MAXPAR labeling kits were purchased from Fluidigm.

Unconjugated antibodies were labelled using MAXPAR kits as indicated in the column “Metal-Isotope”.

Abbreviations of reference addresses: DRFZ (Deutsches Rheumaforschungszentrum Berlin), Miltenyi (Miltenyi Biotec GmbH), Fluidigm (Fluidigm Corp)

| <u>Specificity</u> | <u>Clone</u>             | <u>Antibody source</u> | <u>Metal-Isotope</u> |
|--------------------|--------------------------|------------------------|----------------------|
| CD45               | 5B1                      | Miltenyi               | 176Yb (MAXPAR)       |
| CD19               | Bu-12                    | DRFZ                   | 142Nd (MAXPAR)       |
| CD4                | RPA-T4                   | BioLegend              | 144Nd (MAXPAR)       |
| CD45RO             | UCHL1                    | DRFZ                   | 146Nd (MAXPAR)       |
| CD20               | 2H7                      | Fluidigm               | 147Nd                |
| CD56               | REA196                   | Miltenyi               | 148Nd (MAXPAR)       |
| CD25               | 2A3                      | Fluidigm               | 149Sm                |
| CD169 (Siglec1)    | 7-239                    | Miltenyi               | 150Gd (MAXPAR)       |
| CD123              | 6H6                      | Fluidigm               | 151Eu                |
| CD45RA             | 4G11                     | DRFZ                   | 152Sm (MAXPAR)       |
| CD303              | 201A                     | Fluidigm               | 153Eu                |
| CD195 (CCR5)       | REA245                   | Miltenyi               | 155Gd (MAXPAR)       |
| Siglec 8           | 7C9                      | Miltenyi               | 156Gd (MAXPAR)       |
| CD1c               | L161                     | BioLegend              | 158Gd (MAXPAR)       |
| CD197 (CCR7)       | G0437                    | Fluidigm               | 159Tb                |
| CD11c              | MJ427G12                 | Miltenyi               | 160Gd (MAXPAR)       |
| CD69               | FN50                     | Fluidigm               | 162Dy                |
| CD127              | A019D5                   | Fluidigm               | 165Ho                |
| CD36               | AC106                    | Miltenyi               | 166Er (MAXPAR)       |
| CD27               | L128                     | Fluidigm               | 167Er                |
| CD8                | SK1                      | Fluidigm               | 168 Er               |
| CD8                | GN11                     | DRFZ                   | 196Pt (MAXPAR)       |
| CD16               | 3G8                      | BioLegend              | 169Tm (MAXPAR)       |
| CD3                | UCHT1                    | DRFZ                   | 170Er                |
| CD14               | TM1                      | DRFZ                   | 171Yb                |
| CD38               | HIT2                     | Fluidigm               | 172Yb                |
| HLA-DR             | L243                     | Fluidigm               | 174Yb                |
| CD15               | W6D3                     | BioLegend              | 175Lu                |
| cisPlatin          | live/dead discrimination | see Materials &Methods | 195Pt                |
| intercalator       | DNA staining             | see Materials &Methods | 191Ir/193Ir          |

**Table S2: List of immune cell phenotypes identified in urine**

In this table all leukocyte populations were summarized, which could be identified in urine samples by manually gating. Populations marked in red could be not used for hierarchical cluster analysis shown in Figure 4 because absolute number cells was almost >25.

| short name            | phenotype                                                                                                                                                                                                                                                                                                                                  | plot # |
|-----------------------|--------------------------------------------------------------------------------------------------------------------------------------------------------------------------------------------------------------------------------------------------------------------------------------------------------------------------------------------|--------|
| T cells               | CD3 <sup>+</sup> CD16 <sup>-</sup> Freq. of nucleated cells                                                                                                                                                                                                                                                                                | 6      |
| B cells               | CD3 <sup>+</sup> CD16 <sup>+/+</sup> _CD20 <sup>+</sup> CD19 <sup>+</sup> _CD20 <sup>+</sup> CD19 <sup>+</sup> Freq. of nucleated cells                                                                                                                                                                                                    | 7      |
| NK cells              | CD3 <sup>+</sup> CD16 <sup>+/+</sup> _CD20 <sup>+</sup> CD19 <sup>+</sup> _CD56 <sup>+</sup> CD16 <sup>+</sup> _CD14 <sup>+</sup> HLA-DR <sup>+</sup> Freq. of nucleated cells                                                                                                                                                             | 9      |
| T help                | CD3 <sup>+</sup> CD16 <sup>-</sup> _CD4 <sup>+</sup> CD8 <sup>-</sup> Freq. of CD3 <sup>+</sup> T cells                                                                                                                                                                                                                                    | 11     |
| T cytotox             | CD3 <sup>+</sup> CD16 <sup>-</sup> _CD4 <sup>+</sup> CD8 <sup>+</sup> Freq. of CD3 <sup>+</sup> T cells                                                                                                                                                                                                                                    | 11     |
| T DN                  | CD3 <sup>+</sup> CD16 <sup>-</sup> _CD8 <sup>+</sup> CD4 <sup>-</sup> Freq. of CD3 <sup>+</sup> T cells                                                                                                                                                                                                                                    | 11     |
| Treg                  | CD3 <sup>+</sup> CD16 <sup>-</sup> _CD4 <sup>+</sup> CD8 <sup>-</sup> _CD127 <sup>low</sup> CD25 <sup>+</sup> Freq. of CD4 <sup>+</sup> T cells                                                                                                                                                                                            | 12     |
| act_T help            | CD3 <sup>+</sup> CD16 <sup>-</sup> _CD4 <sup>+</sup> CD8 <sup>-</sup> _HLA-DR <sup>+</sup> Freq. of CD4 <sup>+</sup> T cells                                                                                                                                                                                                               | 13     |
| act_T cytotox         | CD3 <sup>+</sup> CD16 <sup>-</sup> _CD4 <sup>+</sup> CD8 <sup>+</sup> _HLA-DR <sup>+</sup> Freq. of CD8 <sup>+</sup> T cells                                                                                                                                                                                                               | 14     |
| naive/temra_T help    | CD3 <sup>+</sup> CD16 <sup>-</sup> _CD4 <sup>+</sup> CD8 <sup>-</sup> _CD45RO <sup>+</sup> CD45RA <sup>+</sup> Freq. of CD4 <sup>+</sup> T cells                                                                                                                                                                                           | 15     |
| mem_T help            | CD3 <sup>+</sup> CD16 <sup>-</sup> _CD4 <sup>+</sup> CD8 <sup>-</sup> _CD45RO <sup>+</sup> CD45RA <sup>-</sup> Freq. of CD4 <sup>+</sup> T cells                                                                                                                                                                                           | 15     |
| naive/temra_T cytotox | CD3 <sup>+</sup> CD16 <sup>-</sup> _CD4 <sup>+</sup> CD8 <sup>+</sup> _CD45RO <sup>+</sup> CD45RA <sup>+</sup> Freq. of CD8 <sup>+</sup> T cells                                                                                                                                                                                           | 16     |
| mem_T cytotox         | CD3 <sup>+</sup> CD16 <sup>-</sup> _CD4 <sup>+</sup> CD8 <sup>+</sup> _CD45RO <sup>+</sup> CD45RA <sup>-</sup> Freq. of CD8 <sup>+</sup> T cells                                                                                                                                                                                           | 16     |
| cm_T help             | CD3 <sup>+</sup> CD16 <sup>-</sup> _CD4 <sup>+</sup> CD8 <sup>-</sup> _CD45RA <sup>+</sup> CD197 <sup>+</sup> Freq. of CD4 <sup>+</sup> T cells                                                                                                                                                                                            | 17     |
| naive_T help          | CD3 <sup>+</sup> CD16 <sup>-</sup> _CD4 <sup>+</sup> CD8 <sup>-</sup> _CD45RA <sup>+</sup> CD197 <sup>+</sup> Freq. of CD4 <sup>+</sup> T cells                                                                                                                                                                                            | 17     |
| temra_T help          | CD3 <sup>+</sup> CD16 <sup>-</sup> _CD4 <sup>+</sup> CD8 <sup>-</sup> _CD45RA <sup>+</sup> CD197 <sup>+</sup> Freq. of CD4 <sup>+</sup> T cells                                                                                                                                                                                            | 17     |
| em_T help             | CD3 <sup>+</sup> CD16 <sup>-</sup> _CD4 <sup>+</sup> CD8 <sup>-</sup> _CD45RA <sup>+</sup> CD197 <sup>+</sup> Freq. of CD4 <sup>+</sup> T cells                                                                                                                                                                                            | 17     |
| cm_T cytotox          | CD3 <sup>+</sup> CD16 <sup>-</sup> _CD4 <sup>+</sup> CD8 <sup>+</sup> _CD45RA <sup>+</sup> CD197 <sup>+</sup> Freq. of CD8 <sup>+</sup> T cells                                                                                                                                                                                            | 18     |
| naive_T cytotox       | CD3 <sup>+</sup> CD16 <sup>-</sup> _CD4 <sup>+</sup> CD8 <sup>+</sup> _CD45RA <sup>+</sup> CD197 <sup>+</sup> Freq. of CD8 <sup>+</sup> T cells                                                                                                                                                                                            | 18     |
| temra_T cytotox       | CD3 <sup>+</sup> CD16 <sup>-</sup> _CD4 <sup>+</sup> CD8 <sup>+</sup> _CD45RA <sup>+</sup> CD197 <sup>+</sup> Freq. of CD8 <sup>+</sup> T cells                                                                                                                                                                                            | 18     |
| em_T cytotox          | CD3 <sup>+</sup> CD16 <sup>-</sup> _CD4 <sup>+</sup> CD8 <sup>+</sup> _CD45RA <sup>+</sup> CD197 <sup>+</sup> Freq. of CD8 <sup>+</sup> T cells                                                                                                                                                                                            | 18     |
| act_em_T help         | CD3 <sup>+</sup> CD16 <sup>-</sup> _CD4 <sup>+</sup> CD8 <sup>-</sup> _CD45RA <sup>+</sup> CD197 <sup>+</sup> _CD69 <sup>+</sup> CD38 <sup>+</sup> Freq. of CD4 <sup>+</sup> EM T cells                                                                                                                                                    | 19     |
| act_em_T cytotox      | CD3 <sup>+</sup> CD16 <sup>-</sup> _CD4 <sup>+</sup> CD8 <sup>+</sup> _CD45RA <sup>+</sup> CD197 <sup>+</sup> _CD69 <sup>+</sup> CD38 <sup>+</sup> Freq. of CD8 <sup>+</sup> EM T cells                                                                                                                                                    | 20     |
| Eosinophils           | CD3 <sup>+</sup> CD16 <sup>+/+</sup> _CD20 <sup>+</sup> CD19 <sup>+</sup> _CD16 <sup>+/+</sup> CD56 <sup>-</sup> _CD15 <sup>+</sup> CD36 <sup>-</sup> _CD16 <sup>+</sup> Siglec8 <sup>+</sup> Freq. of nucleated cells                                                                                                                     | 22     |
| Mφ                    | CD3 <sup>+</sup> CD16 <sup>+/+</sup> _CD20 <sup>+</sup> CD19 <sup>+</sup> _CD16 <sup>+/+</sup> CD56 <sup>-</sup> _CD15 <sup>+</sup> CD36 <sup>-</sup> _CD16 <sup>+</sup> Siglec8 <sup>+</sup> _HLA-DR <sup>+</sup> CD56 <sup>-</sup> Freq. of nucleated cells                                                                              | 23     |
| Neutrophils           | CD3 <sup>+</sup> CD16 <sup>+/+</sup> _CD20 <sup>+</sup> CD19 <sup>+</sup> _CD16 <sup>+/+</sup> CD56 <sup>-</sup> _CD15 <sup>+</sup> CD36 <sup>-</sup> _CD16 <sup>+</sup> Siglec8 <sup>+</sup> _HLA-DR <sup>+</sup> CD56 <sup>-</sup> _CD15 <sup>+/+</sup> CD16 <sup>+</sup> Freq. of nucleated cells                                       | 24     |
| cl_Monocytes          | CD3 <sup>+</sup> CD16 <sup>+/+</sup> _CD20 <sup>+</sup> CD19 <sup>+</sup> _CD16 <sup>+/+</sup> CD56 <sup>-</sup> _CD15 <sup>+/+</sup> CD36 <sup>+</sup> _HLA-DR <sup>+</sup> CD36 <sup>+</sup> _CD14 <sup>+</sup> CD16 <sup>+</sup> Freq. of parent                                                                                        | 27     |
| ncl_Monocytes         | CD3 <sup>+</sup> CD16 <sup>+/+</sup> _CD20 <sup>+</sup> CD19 <sup>+</sup> _CD16 <sup>+/+</sup> CD56 <sup>-</sup> _CD15 <sup>+/+</sup> CD36 <sup>+</sup> _HLA-DR <sup>+</sup> CD36 <sup>+</sup> _CD14 <sup>+/+</sup> CD16 <sup>+</sup> Freq. of parent                                                                                      | 27     |
| pDC                   | CD3 <sup>+</sup> CD16 <sup>+/+</sup> _CD20 <sup>+</sup> CD19 <sup>+</sup> _CD16 <sup>+/+</sup> CD56 <sup>-</sup> _CD15 <sup>+/+</sup> CD36 <sup>+</sup> _HLA-DR <sup>+</sup> CD36 <sup>+</sup> _CD14 <sup>+</sup> CD16 <sup>+</sup> _CD123 <sup>+</sup> CD303 <sup>+</sup> Freq. of nucleated cells                                        | 29     |
| mDC                   | CD3 <sup>+</sup> CD16 <sup>+/+</sup> _CD20 <sup>+</sup> CD19 <sup>+</sup> _CD16 <sup>+/+</sup> CD56 <sup>-</sup> _CD15 <sup>+/+</sup> CD36 <sup>+</sup> _HLA-DR <sup>+</sup> CD36 <sup>+</sup> _CD14 <sup>+</sup> CD16 <sup>+</sup> _CD123 <sup>+</sup> CD303 <sup>+</sup> _CD11c <sup>+</sup> CD11c <sup>+</sup> Freq. of nucleated cells | 30     |

cytotox: cytotoxic; DN: double negative; act: activated; mem: memory; cm: central memory; em: effector memory; temra: terminally differentiated effector cells; Mφ: macrophages; cl: classical; ncl: non-classical; Freq: Frequency; pDC: plasmacytoid dendritic cells; mDC: myeloid dendritic cells
